# Supplementary material
Source: PubMed Central journal article supplement (PMC9617633)
Supplement: mmc1.pdf [file mmc1.pdf]

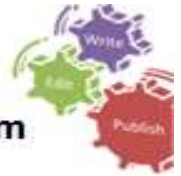

## EDITORIAL CERTIFICATE LETTER

---

This document is to certify that the manuscript listed below was edited for proper English language, grammar, punctuation, spelling, and overall style by one of the highly qualified subject-expert native English speaking editors at **NativeEnglishEdit.com**

The substantive content of the article mentioned below remains the full responsibility of the author/authors:

TITLE OF ARTICLE:

EFFICACY OF OLIVE LEAVES EXTRACT ON THE OUTCOMES OF HOSPITALIZED COVID-19 PATIENTS: A RANDOMIZED, TRIPLE-BLINDED CLINICAL TRIAL

AUTHOR(S):

DR. TAHEREH TOULABI ‘ ELHAM AHMADPOUR ‘  
SAJAD YARAHMADI ‘ DR DAVOUD YADEGARI , DR. AMIR REZA KEYVANFAR

REFER CODE:

EE-2022-77778174-AHMADPOUR-2968-MED

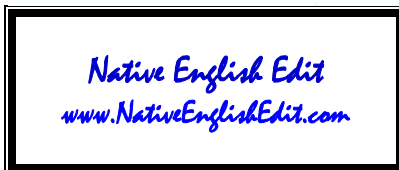

---

Documents receiving this certification should be English-ready for publication; however, the author has the ability to accept or reject our suggestions and changes.

This certificate may be verified at:

[www.NativeEnglishEdit.com](http://www.NativeEnglishEdit.com)

London

East End Road 27, N 3 3QT

United Kingdom
